# Supplementary material for: Cardio-Pulmonary Sequelae in Recovered COVID-19 Patients: Considerations for Primary Care
Source: PubMed Central journal article supplement — J Prim Care Community Health. 2021 Jun 6;12:21501327211023726. doi: 10.1177/21501327211023726 (PMC8188976; doi:10.1177/21501327211023726), 2021-06-06
Supplement: sj-pdf-1-jpc-10.1177_21501327211023726.pdf [file sj-pdf-1-jpc-10.1177_21501327211023726.pdf]

| No, Author                       | Disease severity                      | Patient specific characteristic                                                       | Hospitalization (%) | ICU Admission (%) and length of ICU stay | Length of hospital stay (days) | Complications during stay                                                     | Treatments during hospital stay                                                                                         |
|----------------------------------|---------------------------------------|---------------------------------------------------------------------------------------|---------------------|------------------------------------------|--------------------------------|-------------------------------------------------------------------------------|-------------------------------------------------------------------------------------------------------------------------|
| 1. Alfano <sup>48</sup>          | Severe                                | Renal chronic failure on dialysis                                                     | 100%                | -                                        | 27                             | Lung edema                                                                    | IV furosemide for CKD, and short exchange with hypertonic dialysate solution                                            |
| 2. Brancatella <sup>47</sup>     | Mild                                  | Subacute Thyroiditis after COVID 19 confirmed PCR infection                           | 100%                | -                                        | -                              | Neck pain, unexplained Fever                                                  | Prednisone (corticosteroid)                                                                                             |
| 3. He <sup>51</sup>              | -                                     | SLE                                                                                   | 100%                | -                                        | First stay 12, Second stay 4   | -                                                                             | Mycophenolate mofetil, Prednisone, Hydroxychloroquine, Moxifloxacin, Lopinavir plus ritonavir                           |
| 4. Cavalagli <sup>52</sup>       | Severe                                | Oropharyngeal dysphagia. clinical cranial nerves impairment of lingual, IX, X and XII | 100%                | 100%, 11 days                            | 33                             | Neurologic complications, Acute pulmonary distress, Sepsis, Mechanical trauma | Oxygen support, Non-invasive/Mechanical ventilation, Antibiotics, Anticoagulation, Tocilizumab, Multivitamins, Minerals |
| 5. Chen <sup>59</sup>            | Moderate                              | Thrombocytopenia                                                                      | 100%                | -                                        | 26                             | Severe thrombocytopenia                                                       | Interferon alpha, Umifenovir                                                                                            |
| 6. May <sup>60</sup>             | Mild                                  | Rash                                                                                  | -                   | -                                        | -                              | -                                                                             | -                                                                                                                       |
| 7. Insausti-García <sup>64</sup> | Mild                                  | Papillophlebitis                                                                      | -                   | -                                        | -                              | -                                                                             | Acetylsalicylic acid, Bromfenac; Sustained- release dexamethasone implant                                               |
| 8. Lu <sup>17</sup>              | Mild 78.3%, Severe 20%, Critical 1.7% | Micro-structural and functional brain changes                                         | -                   | -                                        | -                              | -                                                                             | Oxygen therapy, Anti-viral therapy, Interferon, Antibiotics, Hormonotherapy                                             |
| 9. Xia <sup>61**</sup>           | Severe                                | Mechanical ventilated                                                                 | 100%                | 100%                                     | C1: 40, C2: 38                 | C2: Bilateral Pneumothorax                                                    | Antiviral therapy, Antibiotic therapy,                                                                                  |

|                            |        |                            |      |                         |   |                                          |                                                                                  |
|----------------------------|--------|----------------------------|------|-------------------------|---|------------------------------------------|----------------------------------------------------------------------------------|
|                            |        | patients                   |      |                         |   |                                          | Prone position ventilation, LMWH. C2: Tracheal Intubation, Venous-venous (ECMO). |
| 10. Gervasio <sup>65</sup> | Severe | Patients with tracheostomy | 100% | At first admission 100% | - | Tracheal stenosis, respiratory distress. | Both cases had intubation and open surgical tracheostomy                         |

\*\*C1= First Case, C2= Second Case

**Supplementary Table 1. Complications and clinical course of COVID-19 patients with specific characteristics.**

| No, Author                   | Status                                                                                                                | Complication onset after recovery (days) | Signs                                            | Symptoms                                                           | Laboratory findings                                                                                               | Radiological findings                                             | Diagnosis                 | Outcomes                                                           |
|------------------------------|-----------------------------------------------------------------------------------------------------------------------|------------------------------------------|--------------------------------------------------|--------------------------------------------------------------------|-------------------------------------------------------------------------------------------------------------------|-------------------------------------------------------------------|---------------------------|--------------------------------------------------------------------|
| 1. Alfano <sup>48</sup>      | Recurrence of PCR positivity, on maintenance dialysis for end renal stage disease that presents with pulmonary edema. | 28 days                                  | Fever, RR 30 bpm                                 | At D28: Dyspnea, Low grade fever; At D48: Dyspnea, Hemoptysis      | D28: Increased procalcitonin, Blood culture negative, negative nasopharyngeal RT-PCR; D48: Nasopharyngeal PCR (+) | D28: CXR acute pulmonary edema; D48: Multiple bilateral opacities | Reinfection of SARS-CoV-2 | Recovery one week after third admission (D48) with negative RT-PCR |
| 2. Brancatella <sup>47</sup> | SAT presentation after one month of PCR RT confirmed COVID                                                            | 4 days                                   | Thyroid gland tenderness and enlargement, Fever. | Fatigue, Palpitations, and Anterior neck pain radiating to the jaw | FT4 and FT3 mildly elevated, Tg detectable at low level with positive TgAb, and elevated inflammatory             | Thyroid ultrasound: multiple, diffuse hypoechoic areas            | Subacute thyroiditis      | Recovery within 2 weeks of prednisone administration               |

|                            |                                               |                                                      |                                                                           |                                                                                              |                                                                                                                                                                                                                       |                                                             |                                                                                                |                                                                                                                                                                                                                               |
|----------------------------|-----------------------------------------------|------------------------------------------------------|---------------------------------------------------------------------------|----------------------------------------------------------------------------------------------|-----------------------------------------------------------------------------------------------------------------------------------------------------------------------------------------------------------------------|-------------------------------------------------------------|------------------------------------------------------------------------------------------------|-------------------------------------------------------------------------------------------------------------------------------------------------------------------------------------------------------------------------------|
|                            | (February 28)                                 |                                                      |                                                                           |                                                                                              | markers.                                                                                                                                                                                                              |                                                             |                                                                                                |                                                                                                                                                                                                                               |
| 3.He <sup>51</sup>         | Case of a SLE patient with PCR confirmed      | 8 days                                               | Blood gas Analysis<br>Oxygen 59%, oxygen partial pressure 34 mmHg, pH 7.3 | D1: Dry Cough, Fatigue;<br>D7: Fever;<br>D9: SOB, Sore throat, Expectoration;<br>D12: Nausea | Oxygen saturation 59%, PO <sub>2</sub> 34 mmHg, PCO <sub>2</sub> 36.4 mmHg, pH value 7.348, WBC $3.11 \times 10^9/L$ , CD45+ lymphocytes (1144 cells/ $\mu$ L), T helper lymphocytes (CD3+ CD4+) (387 cells/ $\mu$ L) | CT GGO and stripe shadows in the lower lobe of both lungs   | Recurrence of SARS COV2 RNA in a Systemic lupus erythematosus patient                          | Full recovery, with 3 consecutive negative SARS-CoV-2 RNA tests                                                                                                                                                               |
| 4.Cavaliagli <sup>52</sup> | Cranial involvement after COVID 19 infection. | 33 days                                              | Weakness, Dysphagia, Clinical cranial nerves impairment                   | Moderate limbs and trunk weakness, Fever, Dyspnea, Weight loss                               | Low serum levels of albumin, iron, vitamin D, transferrin and creatinine; High D-dimer; Electrophysiological study: lower limb chronic axonal sensorimotor polyneuropathy                                             | Lung CT scan: bilateral and severe interstitial involvement | COVID-19 pneumonia with PTE; Patent foramen ovale with post COVID-19 cranial nerve dysfunction | Discharged 12 weeks from disease onset. Regained physical independence and regular foods and drink swallowing with residual right XII CN impairment, slightly limbs weakness and residual popliteal sciatic bilateral deficit |
| 5.Chen <sup>59</sup>       | Acute hematologic disease after COVID 19      | Day 29 of infection, 9 days after hospital admission | -                                                                         | Fever, Muscle aches, Dyspnea, Cough                                                          | Elevated fibrinogen (5.37g/L at admission and 4.4g/L on day 29), Platelet                                                                                                                                             | Chest CT- multiple ground glass densities (absorbed         | Severe thrombocytopenia                                                                        | Recovery on day 46 after treatment with IV Ig 400mg/kg                                                                                                                                                                        |

|                                 |                                                                                                 |                                           |                                                                                                                                    |                                                                                             |                                                                                                                                                                                                                                     |                                                           |                                         |                                                                                                             |
|---------------------------------|-------------------------------------------------------------------------------------------------|-------------------------------------------|------------------------------------------------------------------------------------------------------------------------------------|---------------------------------------------------------------------------------------------|-------------------------------------------------------------------------------------------------------------------------------------------------------------------------------------------------------------------------------------|-----------------------------------------------------------|-----------------------------------------|-------------------------------------------------------------------------------------------------------------|
|                                 | nucleic acid test (+).                                                                          |                                           |                                                                                                                                    |                                                                                             | count 2x10 <sup>9</sup> /L (Day 29), lymphocyte subset and autoimmune antibody analysis at platelet nadir time showed increased percent of B cells from 18.62% on day 21 to 34.8% on day 29. Bone marrow biopsy- low megakaryocytes | after 1 week one week of treatment)                       |                                         | daily and dexamethasone 10mg daily                                                                          |
| 6.May <sup>60</sup>             | Dermatitis developed after SARS-CoV-2 RNA positive test.                                        | 28 days after full recovery from COVID-19 | Maculopapular exanthem on the trunk, arms and legs. D5-cervical lymphadenopathy, large raised scaly patch on the back of the torso | No fever or itchiness                                                                       | Normal blood work, normal inflammatory markers.                                                                                                                                                                                     | Normal ECHO                                               | Rash vs Pityriasis rosacea              | Rash persisted for 2 weeks with gradual resolution                                                          |
| 7.Insausti-García <sup>64</sup> | Persistent and painless decrease in the sensitivity of vision after clinically suspected COVID. | 42 days                                   | Decrease sensitivity of vision in left eye                                                                                         | Fundus examination: Dilated, tortuous retinal vessels, disc edema, and retinal hemorrhages. | Positive for serum IgM and IgG SARS-CoV-2 qualitative ELISA, D-dimers (672µg/L), fibrinogen (451 mg/dL). (CRP) 0.898 mg/dL                                                                                                          | (OCT) showed papillary edema                              | Papillophlebitis                        | Improvement after dexamethasone intravitreal injected, gradual recovery of vision as of 20/40 2 weeks later |
| 8.Lu <sup>17</sup>              | Prospective study of MRI follows up of recovery                                                 | -                                         | -                                                                                                                                  | Neurological (68.3%), Mood change (41.7%), Fatigue                                          | Median (IQR): WBC 4.7 (3.85-6.76), Lymphocyte 1.06 (0.77-                                                                                                                                                                           | Higher bilateral (GMV) in olfactory cortices, hippocampus | Cerebral microstructural changes on MRI | -                                                                                                           |

|                      |                                                                              |   |                                                             |                                                                                                                                                                                                                                                                                  |                                                                                           |                                                                                                                                                                                                                               |          |                                                                                                                                                |
|----------------------|------------------------------------------------------------------------------|---|-------------------------------------------------------------|----------------------------------------------------------------------------------------------------------------------------------------------------------------------------------------------------------------------------------------------------------------------------------|-------------------------------------------------------------------------------------------|-------------------------------------------------------------------------------------------------------------------------------------------------------------------------------------------------------------------------------|----------|------------------------------------------------------------------------------------------------------------------------------------------------|
|                      | d, confirmed COVID patients with PCR.                                        |   |                                                             | (26.7%), Headache (25%), Vision change (21.7%), Myalgia (15%), Impaired mobility (11.7%), Memory loss (13.3%), Taste loss (6.7%), Limb numbness (6.7%), Tremor (6.7%), Smell loss (3.3%), Hearing loss (1.7%), Fever (88.3%), Cough (56.7%), Gastrointestinal discomfort (13.3%) | 1.49), LDH 223(189.5-279.5)                                                               | pi, insulas, left Rolandic operculum, left Heschl's gyrus and right cingulate gyrus and a general decline of MD, AD, RD accompanied with an increase of FA in white matter, especially AD in the right CR, EC and SFF, and MD |          |                                                                                                                                                |
| 9. Xia <sup>61</sup> | Findings among ventilated patients caused by confirmed severe COVID disease. | - | 1C: RR 40 bpm, Oxygen saturation 45% & oxygen flow 12 L/min | C1: Severe dyspnea                                                                                                                                                                                                                                                               | ABG (2C): pH7.463, PaCO2 51 mmHg, PaO2 80.4 mmHg, HCO3 34.9 mmol/L, and PaO2/FiO2 268mmHg | CT: Patients with bilateral diffuse GGO, interstitial fibrosis and traction bronchiectasis.                                                                                                                                   | ARDS     | C1: Tracheotomy, was transferred to other hospital; C2: Transferred to another hospital for pulmonary rehabilitation on 38 days post-admission |
| 10.                  | Tracheal                                                                     | - | -                                                           | (CT) and                                                                                                                                                                                                                                                                         | -                                                                                         | CT: tracheal                                                                                                                                                                                                                  | Tracheal | C1:                                                                                                                                            |

|                |                                                                             |  |  |                                         |  |                                 |                                        |                                                                                                                       |
|----------------|-----------------------------------------------------------------------------|--|--|-----------------------------------------|--|---------------------------------|----------------------------------------|-----------------------------------------------------------------------------------------------------------------------|
| Gervasio<br>65 | stenosis after tracheostomy in mechanical ventilated COVID PCR (+) patients |  |  | bronchoscopy signs of tracheal stenosis |  | stenosis without lung findings. | stenosis and BMI >30 in both patients. | Improvement after intravenous steroids for 10 days<br>C2: Did not improve after steroids, went to tracheal resection. |
|----------------|-----------------------------------------------------------------------------|--|--|-----------------------------------------|--|---------------------------------|----------------------------------------|-----------------------------------------------------------------------------------------------------------------------|

**Supplementary Table 1 (Continued). Complications and clinical course of COVID-19 patients with specific characteristics.**

C1= First Case, C2= Second Case; ABG Arterial blood gases; CT Computed Tomography; BMI Body Mass Index; ARDS Acute respiratory distress syndrome; RR Respiratory Rate; GGO Ground glass opacification; GMV: Bilateral Gray matter volumes; CXR Chest X Ray; OCT Optical coherence Tomography; SAT: Subacute Thyroiditis
